# Supplementary material for: Light-driven liquid metal nanotransformers for biomedical theranostics
Source: PubMed Central journal article supplement (PMC5460022; doi:10.1038/ncomms15432), 2017-05-31
Supplement: ncomms15432-s1.pdf [file ncomms15432-s1.pdf]

Supplementary Figures

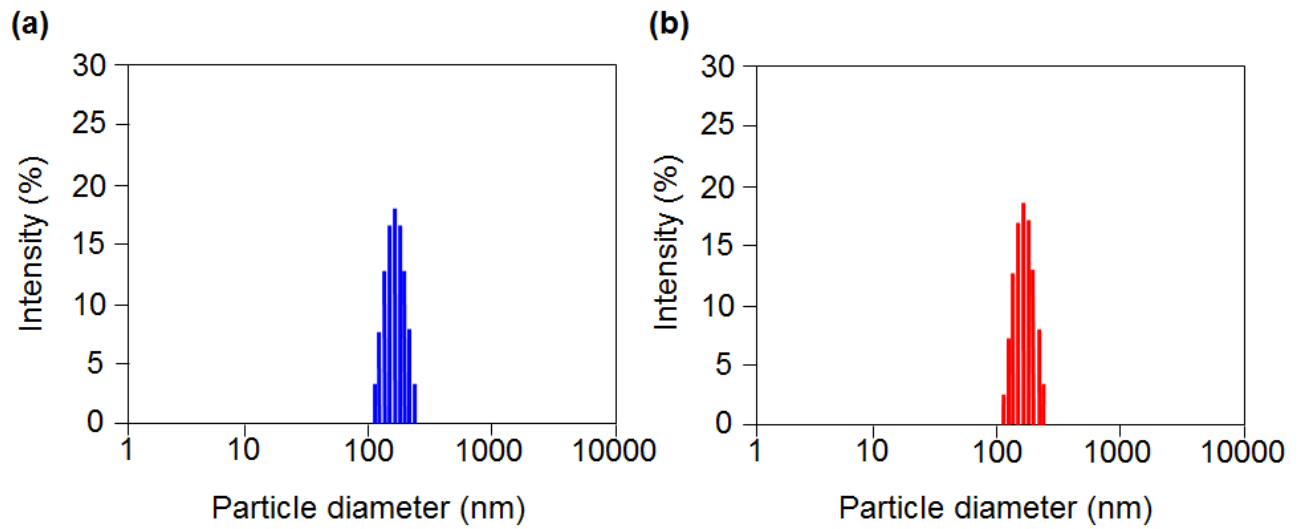

Supplementary Figure e 1. DLS analyses of DSPE-PEG<sub>2000</sub>-Amine-DC(8,9)PC-LM (a) immediately after its preparation and (b) after 3 days.

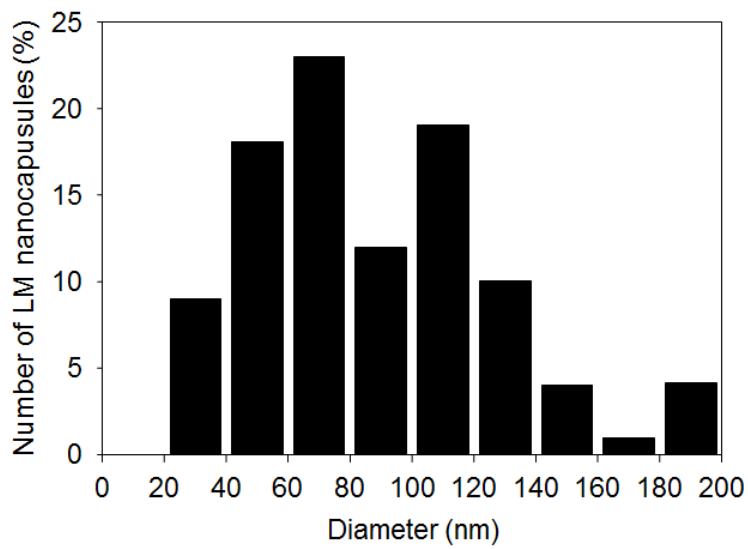

Supplementary Figure 2. Particle size distribution of LM nanocapsules ( $N = 100$ ) from TEM observation.

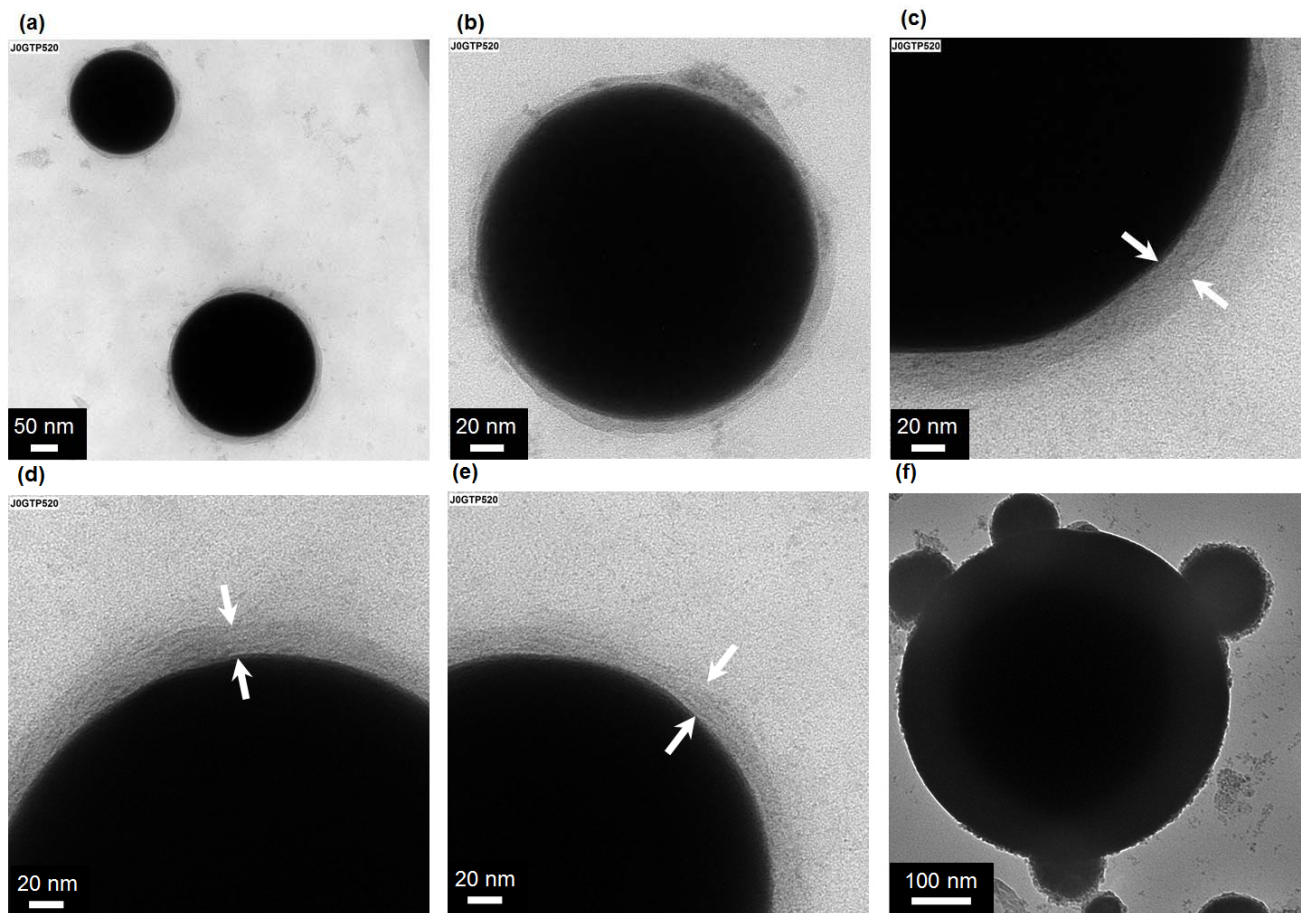

**Supplementary Figure 3** . TEM images of (a–e) DSPE-PEG<sub>2000</sub>-Amine-DC(8,9)PC-LM and (f) DSPE-PEG<sub>2000</sub>-Amine-LM. White arrows represent polymeric shell structure of UV-cured DSPE-PEG<sub>2000</sub>-Amine and DC(8,9)PC molecules.

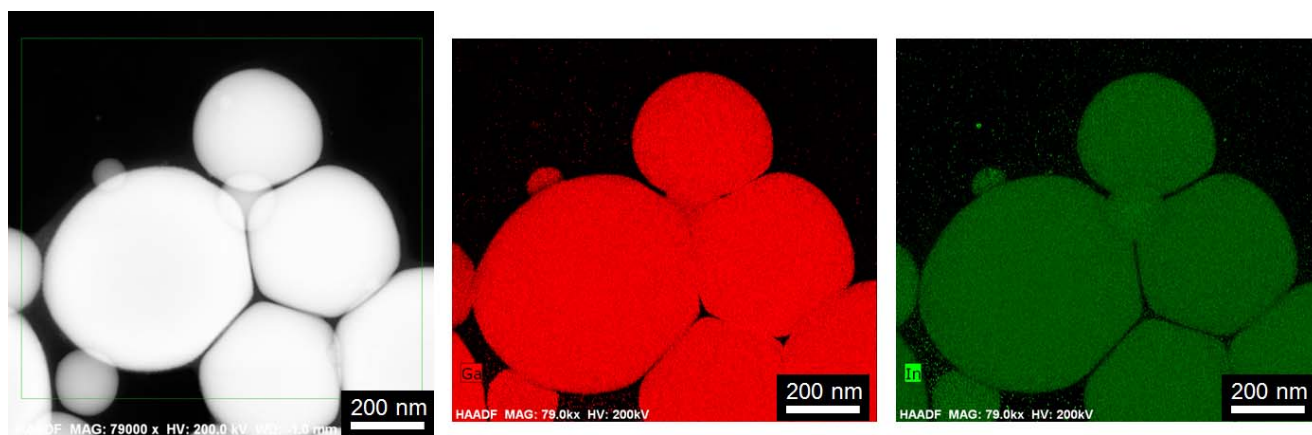

**Supplementary Figure 4**. STEM/EDS mapping of DSPE-PEG<sub>2000</sub>-Amine-DC(8,9)PC-LM nanocapsules.

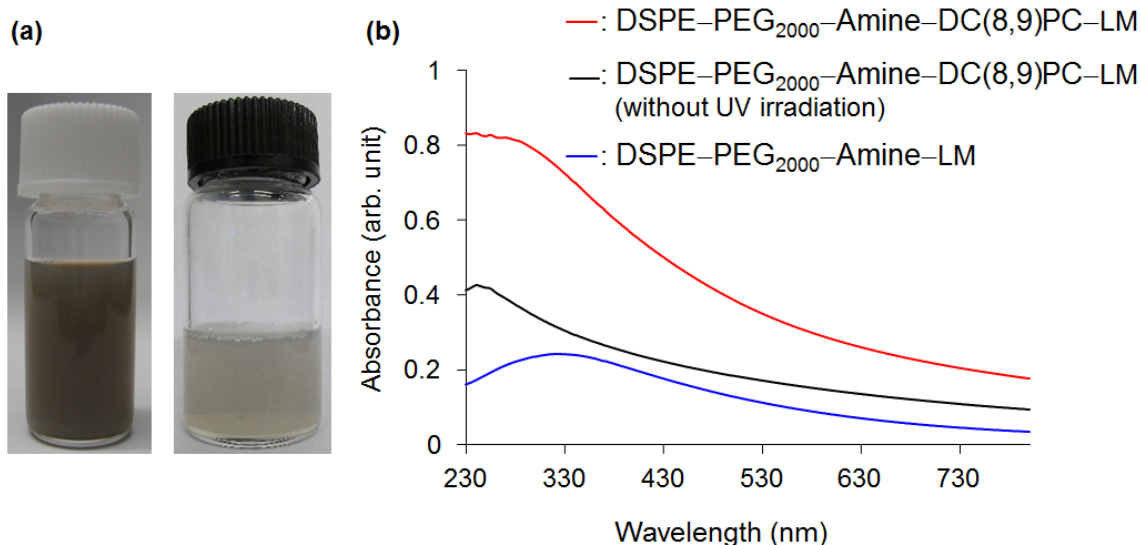

**Supplementary Figure 5.** Water dispersibility of LM nanocapsules. (a) Aqueous suspensions of (left) DSPE-PEG<sub>2000</sub>-Amine-DC(8,9)PC-LM and (right) DSPE-PEG<sub>2000</sub>-Amine-LM. (b) UV-Vis-NIR absorbance of LM nanoconjugates after centrifugation at 1,000 rpm for 10 min at 20 °C.

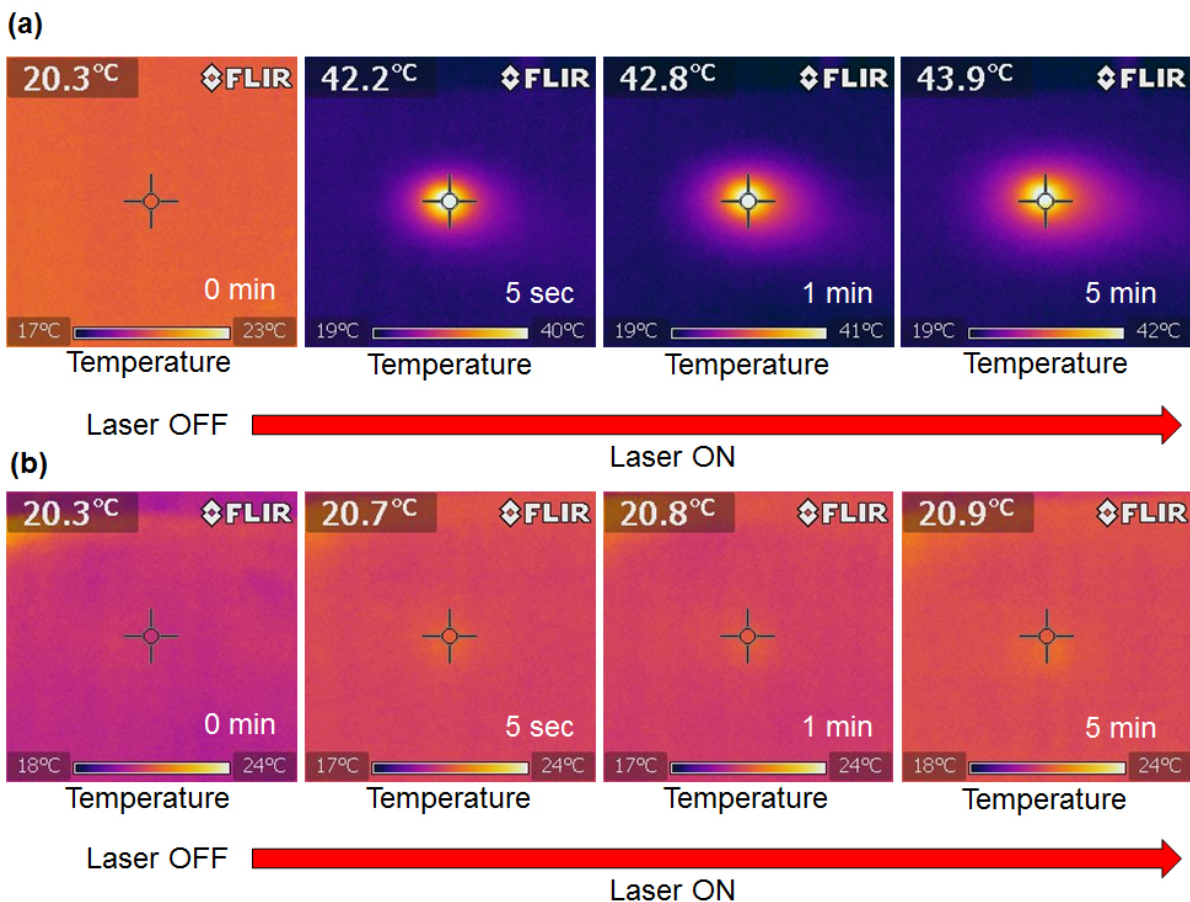

**Supplementary Figure 6.** Thermographic images on the surface of (a) a representative LM droplet (1 mg) and (b) filter paper, using a 785-nm NIR laser at 1 W ( $\sim 80 \text{ mW mm}^{-2}$ ) for 5 min.

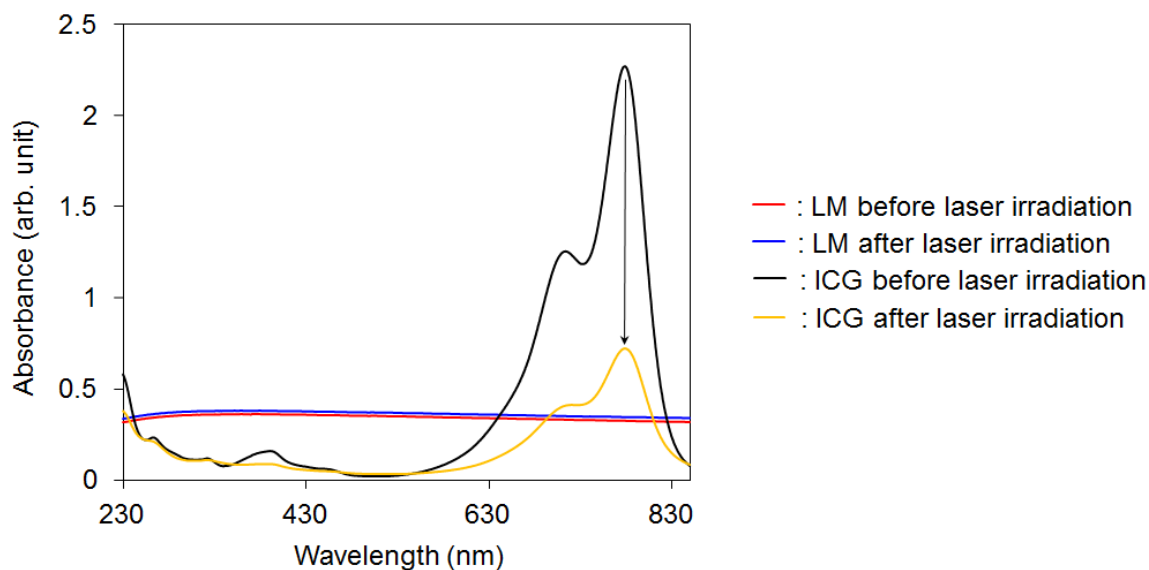

**Supplementary Figure 7.** Photothermal stability of LM after 785-nm NIR laser irradiation at 1 W ( $\sim 80 \text{ mW mm}^{-2}$ ) for 1 hour. LM was dispersed in water by DSPE-PEG<sub>2000</sub>-Amine.

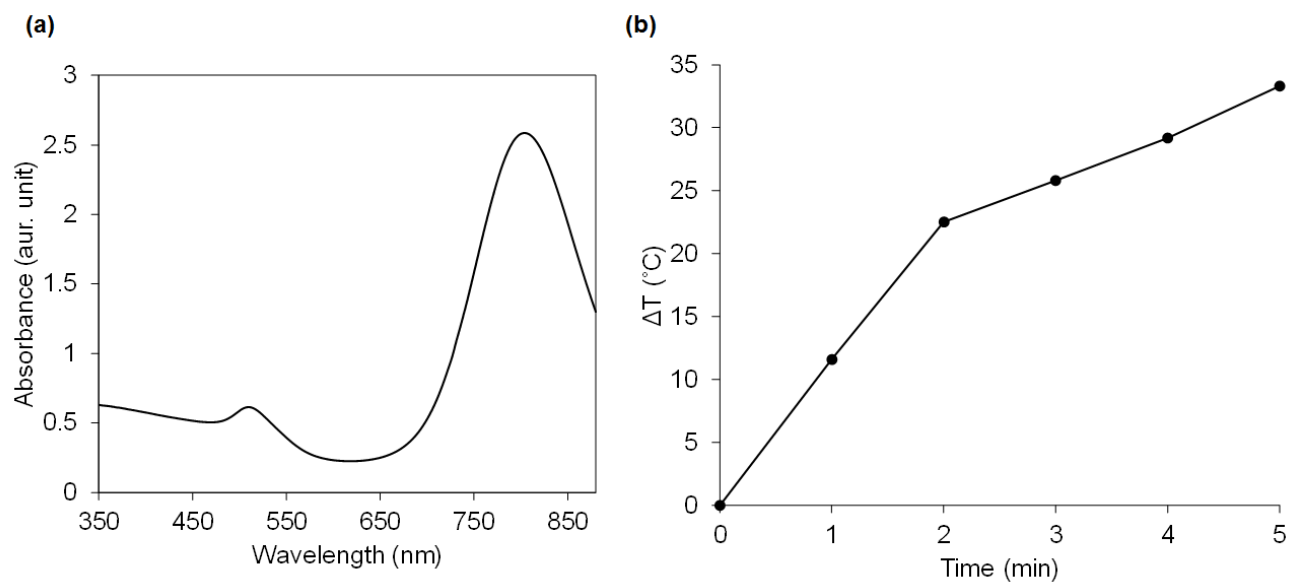

**Supplementary Figure 8.** (a) Optical absorbance and (b) photothermal property of Au-NR1 solution after 785-nm NIR laser irradiation at 1 W ( $\sim 80 \text{ mW mm}^{-2}$ ) for 5 min. Concentration of Au-NR1 =  $100 \mu\text{g ml}^{-1}$ .

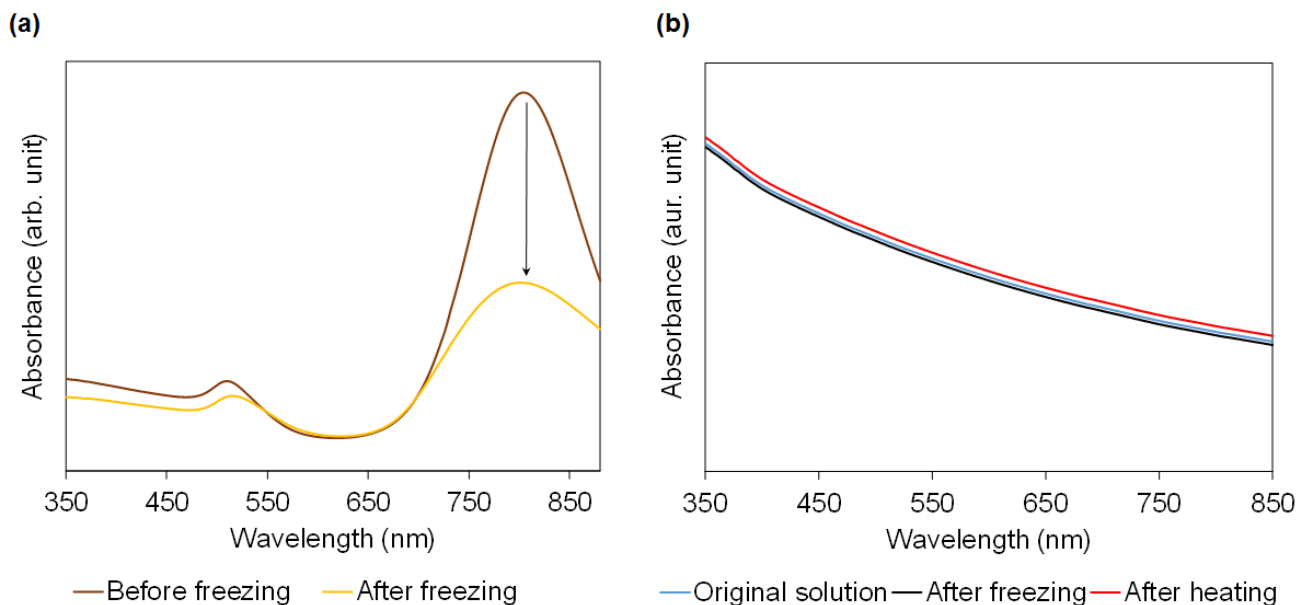

**Supplementary Figure 9.** (a) Optical absorbance of Au-NR1 before (brown line) and after freezing (yellow line). (b) Heating and freezing resistances of LM nanocapsules. Concentrations of LM and Au-NR were adjusted at  $500 \mu\text{g ml}^{-1}$ . Temperature of heating and freezing were  $80$  and  $-80^\circ\text{C}$ , respectively.

It is well known that Au-NRs are very unstable against freezing and heating due to the shape deformations (degradation).<sup>1,2</sup> Indeed, optical absorbance of Au-NR1 was obviously decreased when it was frozen in an aqueous solution ( $-80^\circ\text{C}$ ) for 1 hour because of coalescent reshaping of Au-NRs (Supplementary Figure 9a).<sup>1,2</sup> These molecular degradations could be caused to reduce the photothermal conversion efficiency of Au-NRs.

Post-laser (1 min)

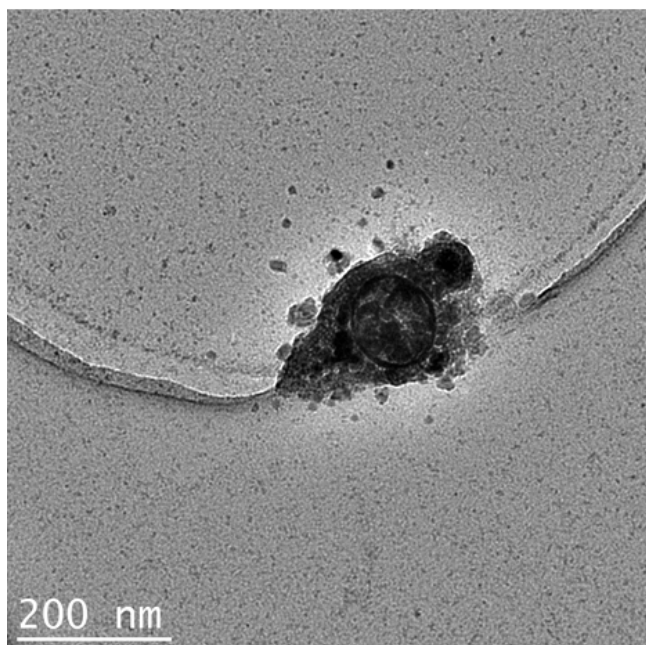

Post-laser (1 min)

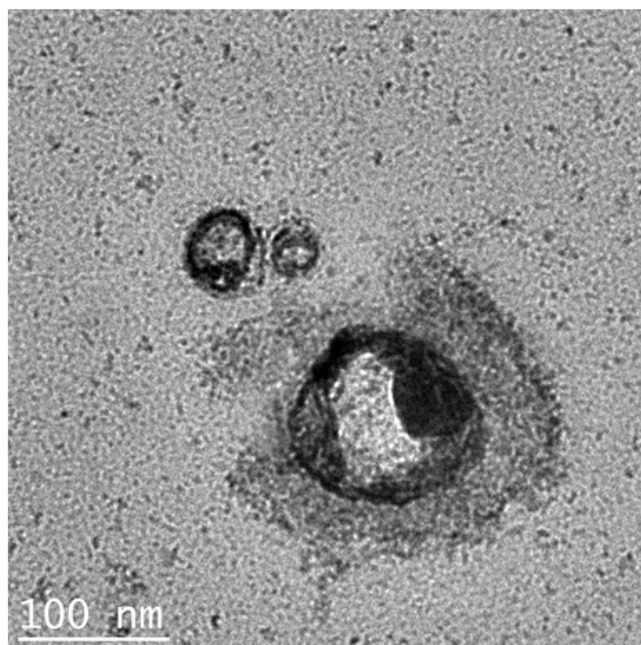

Post-laser (3 min)

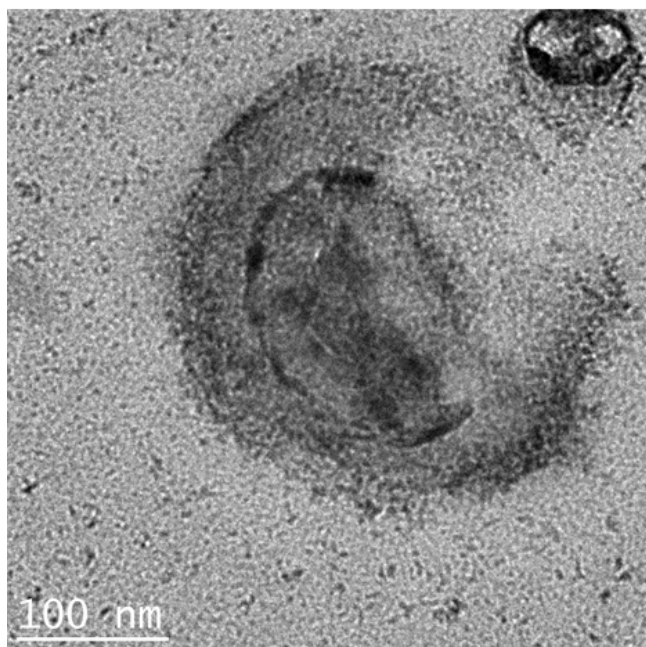

Post-laser (3 min)

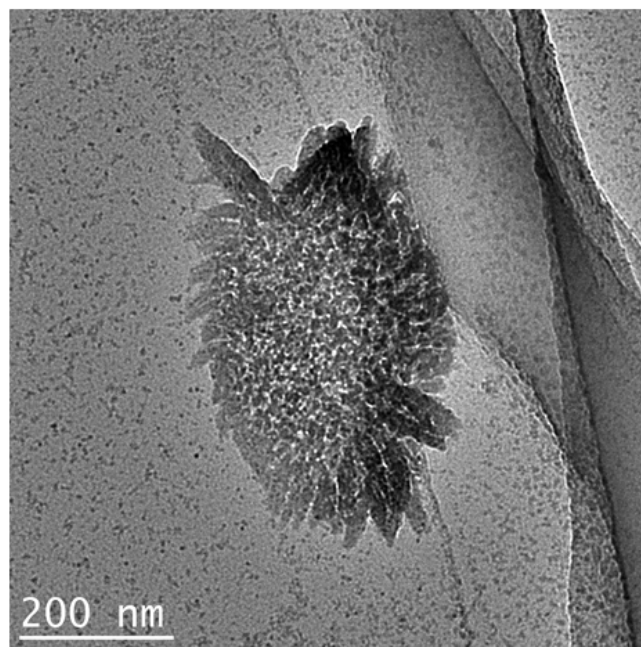

**Supplementary Figure 10.** TEM images of DSPE-PEG<sub>2000</sub>-Amine-DC(8,9)PC-LM after laser irradiation for 1 or 3 min (785 nm, 1 W,  $\sim 80$  mW mm<sup>-2</sup>).

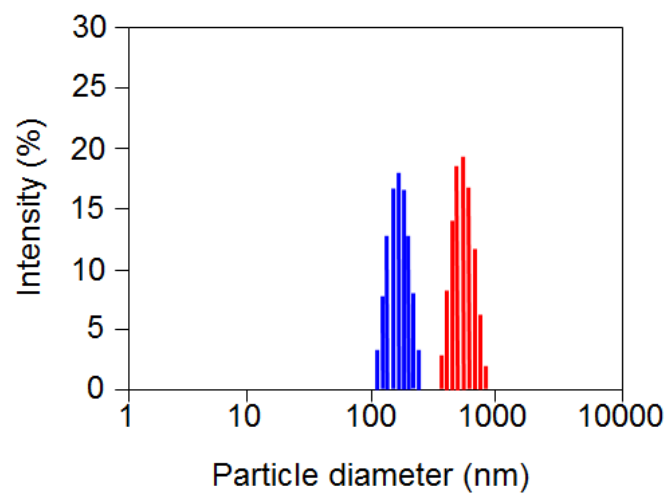

■ : Before laser irradiation (Average diameter = 150 nm)  
■ : After laser irradiation (Average diameter = 464 nm)

**Supplementary Figure 11.** DLS analyses of DSPE-PEG<sub>2000</sub>-Amine-DC(8,9)PC-LM before and laser irradiation for 1 h (785 nm, 1 W, ~80 mW mm<sup>-2</sup>).

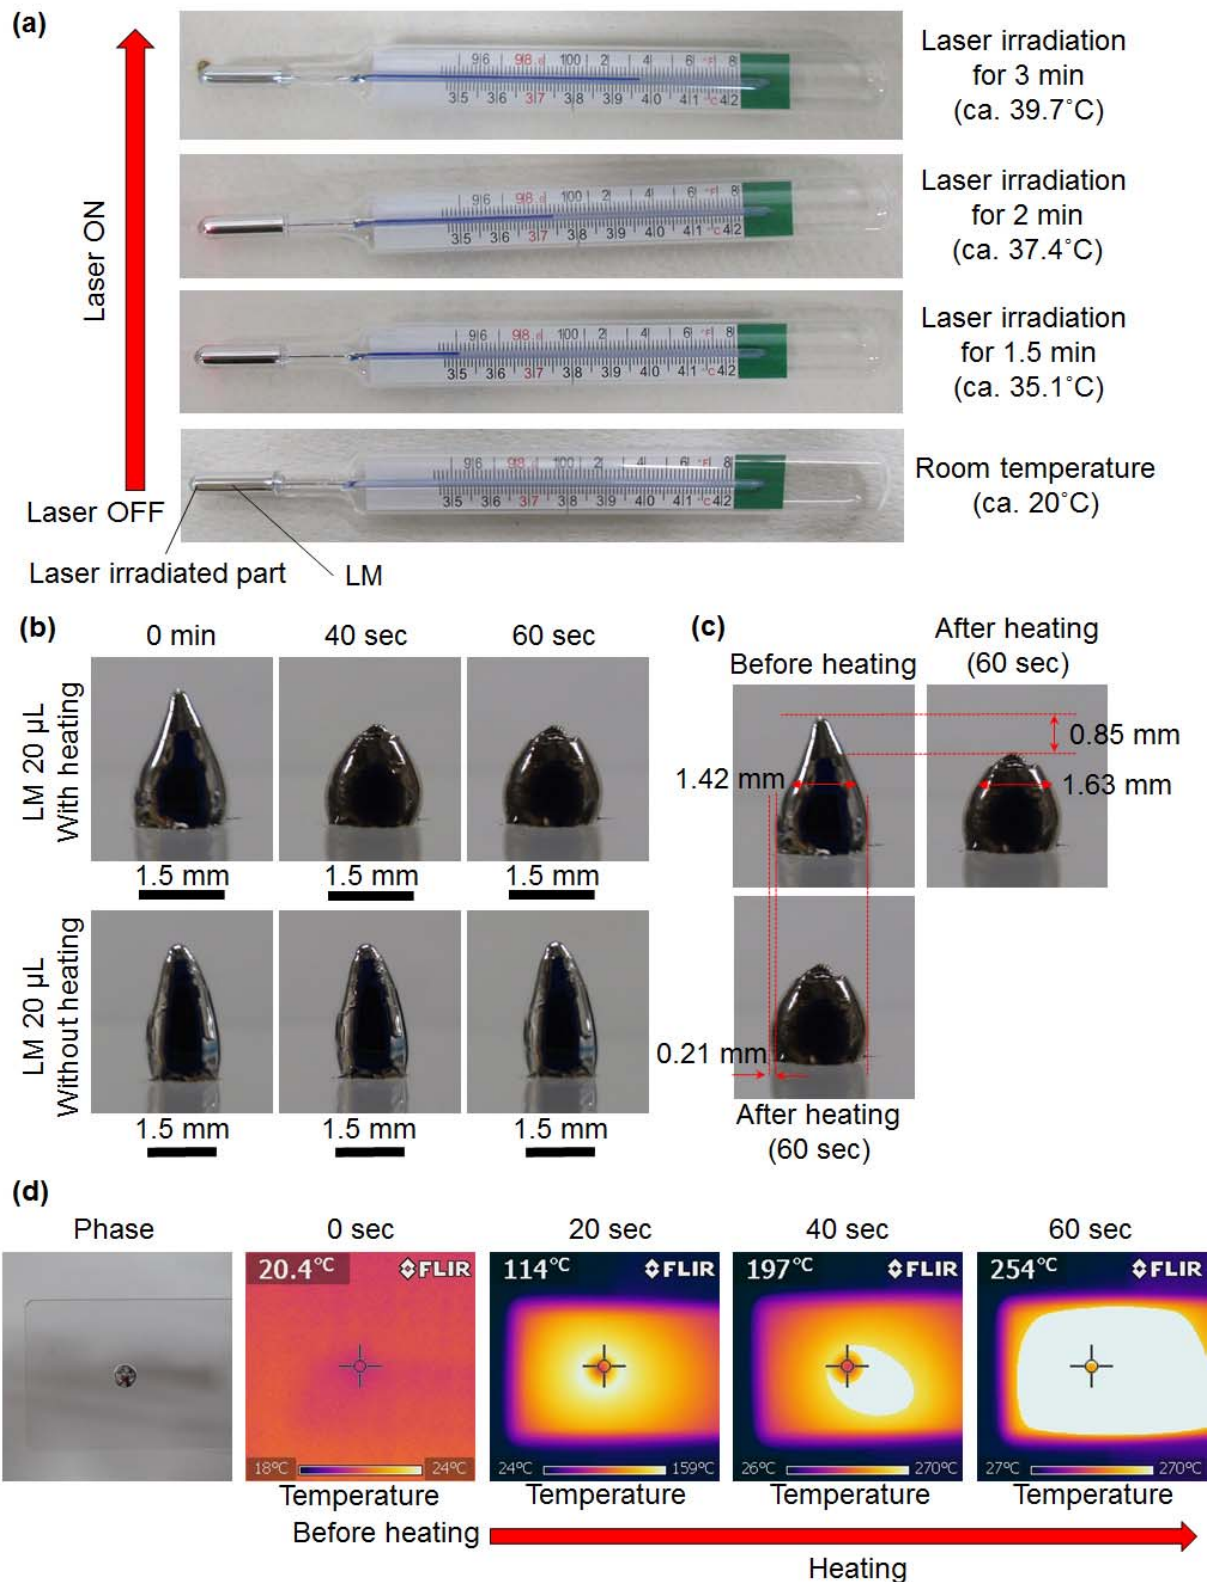

**Supplementary Figure 12.** Thermal expansion of LMs. (a) Laser-induced temperature changing and thermal expansion of a Galinstan thermometer. (b and c) Thermal expansion and shape changing of an EGaIn LM droplet by heating. (d) Thermographic images on the surface of a LM droplet during heating.



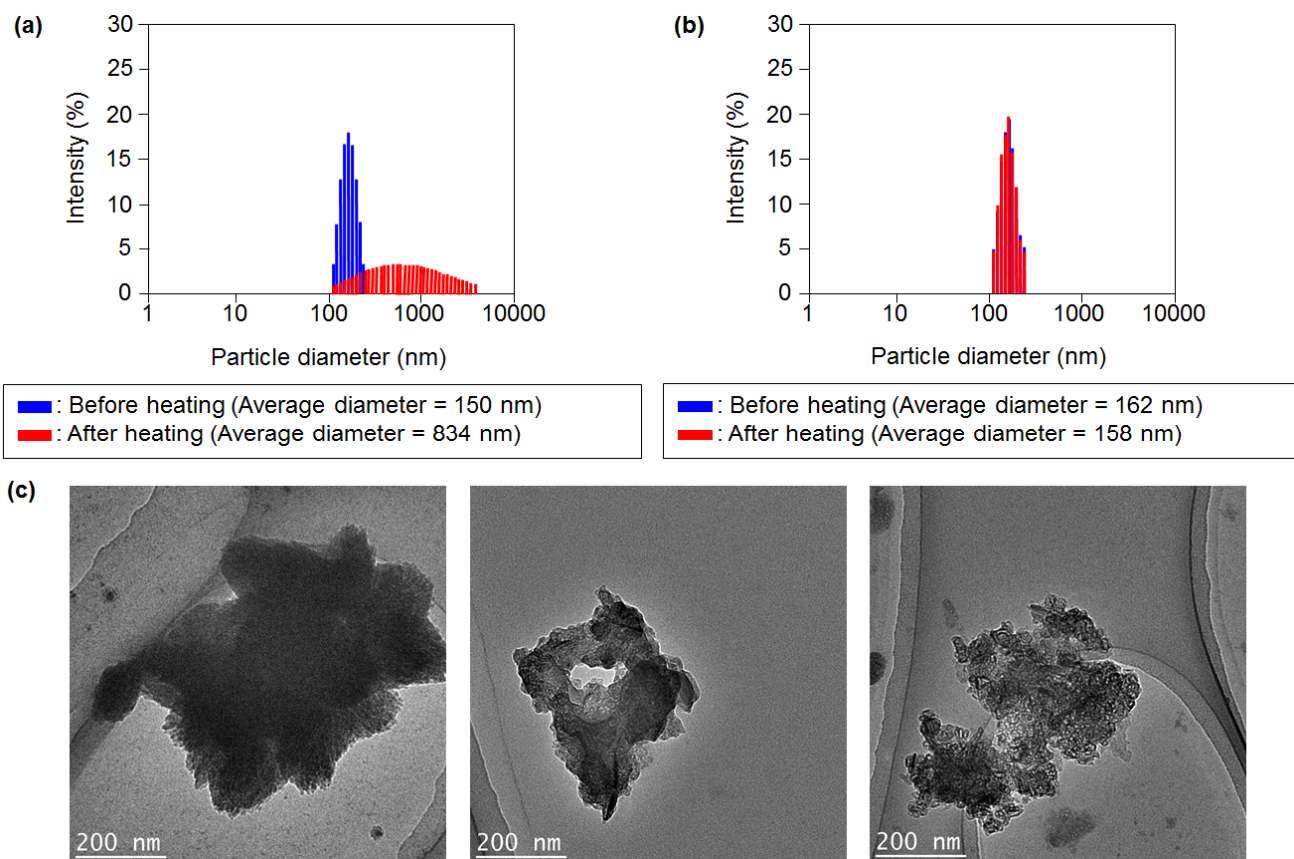

**Supplementary Figure e 13.** DLS analyses of (a) LM nanocapsule and (b) DSPE-PEG<sub>2000</sub>-Amine and DC(8,9)PC nanocapsule without LM before and after heating at 130°C for 30 min. (c) TEM images of LM nanocapsules after heating at 130°C for 30 min.

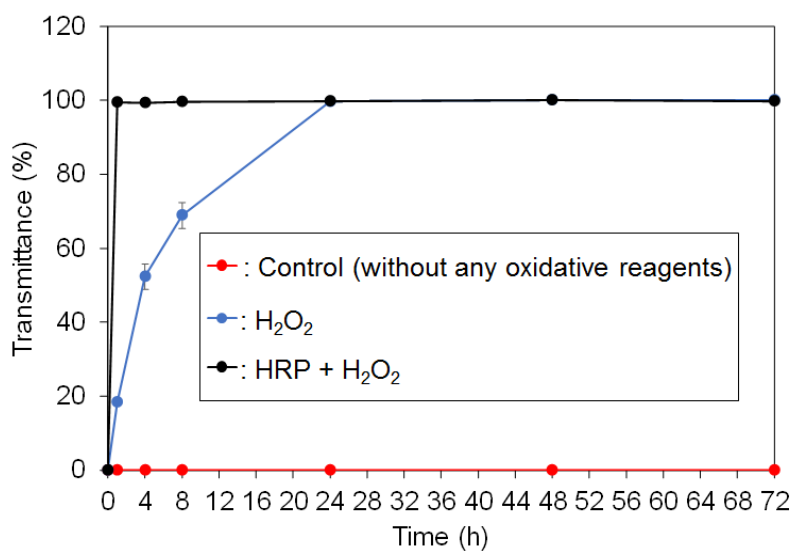

**Supplementary Figure e 14.** Degradation of LM nanocapsules by H<sub>2</sub>O<sub>2</sub>- and enzymatic-oxidative treatments. Error bars represent standard deviations of three separate measurements.

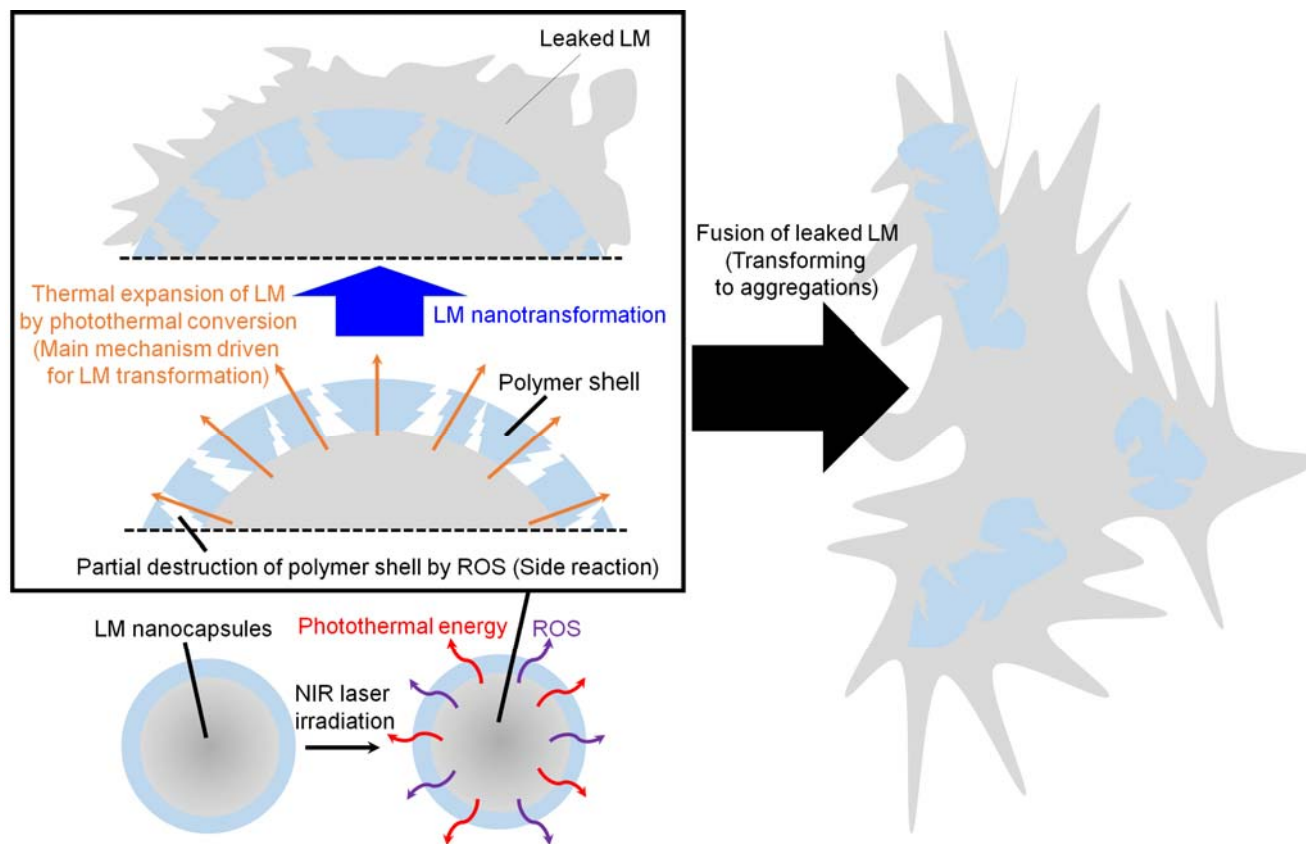

**Supplementary Figure 15 .** Proposed mechanism for laser-induced disintegration and transformation of LM nanocapsules.

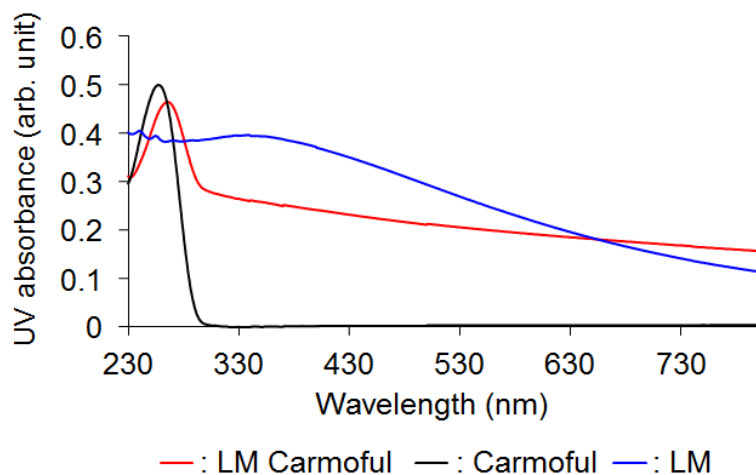

**Supplementary Figure 16.** UV-Vis-NIR absorbance of DSPE-PEG<sub>2000</sub>-Amine-DC(8,9)PC-LM encapsulating carmofur in water (red line; LM concentration: 270  $\mu\text{g ml}^{-1}$ ), DSPE-PEG<sub>2000</sub>-Amine-DC(8,9)PC-LM in water (blue line; LM concentration: 270  $\mu\text{g ml}^{-1}$ ), and carmofur in ethanol (black line; carmofur concentration: 267  $\mu\text{g ml}^{-1}$ ).

(a)

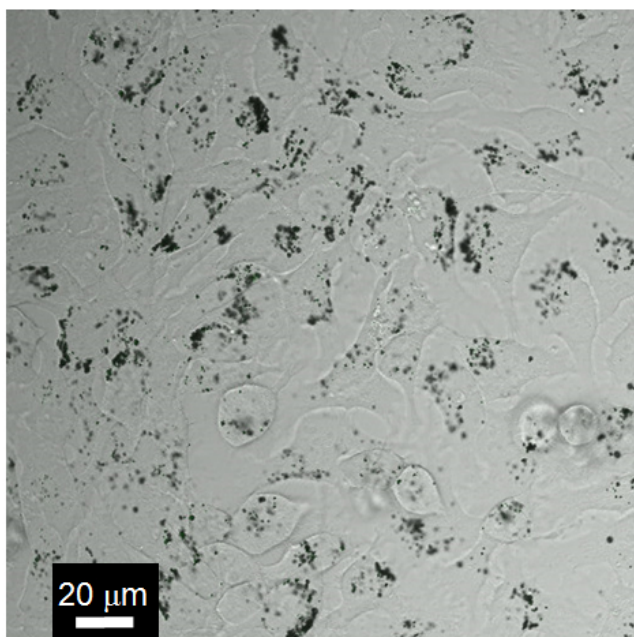

(b)

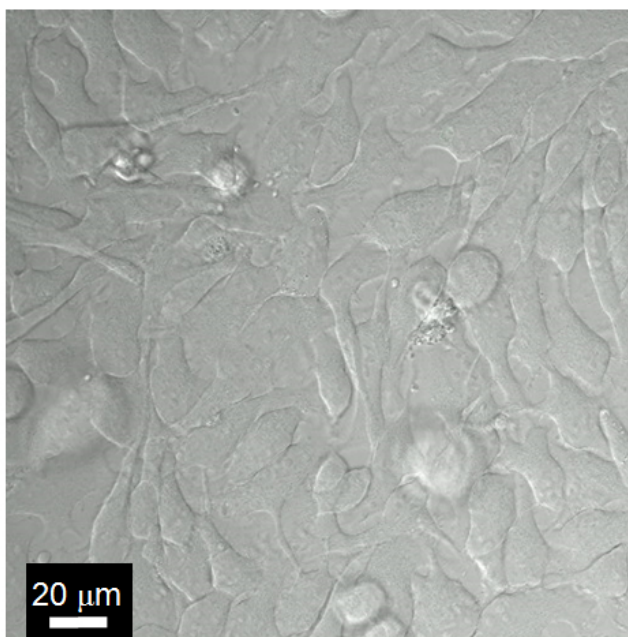

**Supplementary Figure e 17.** Confocal microscopic differential-interference-contrast (DIC) images of HeLa cells incubated for 4 h with (a) DSPE-PEG<sub>2000</sub>-Amine-DC(8,9)PC-LM (LM concentration: 100 μg/mL) and (b) control without LM nanocapsules. Objective, 40×.

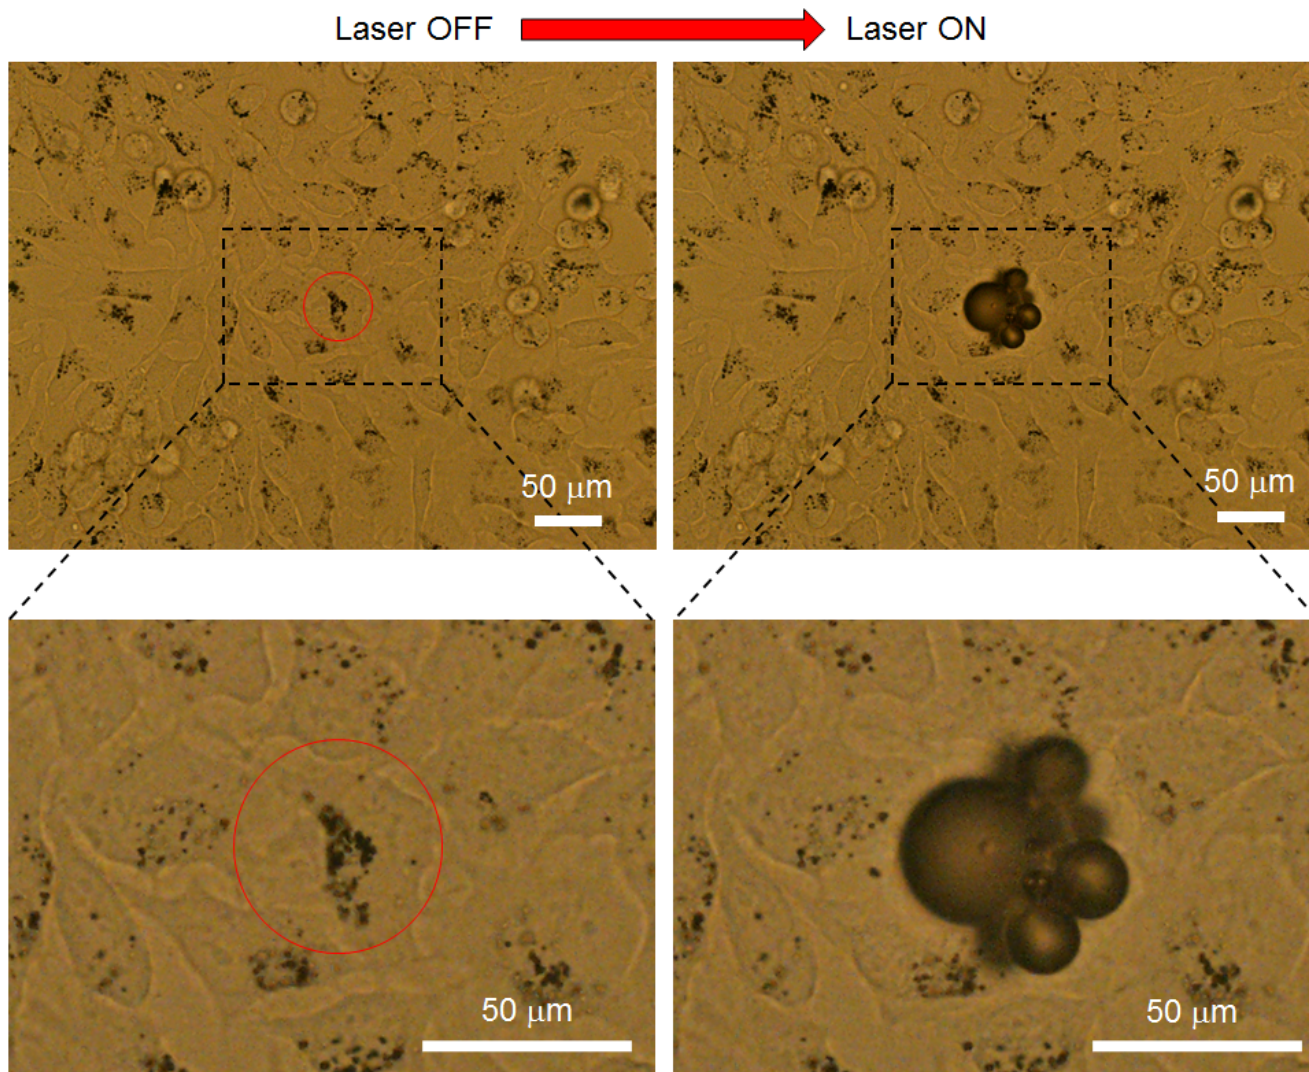

**Supplementary Figure 18.** Real-time elimination of HeLa cells caused by laser-induced LM nanocapsules before and after laser irradiation (808 nm, 564 mW,  $\sim 287 \mu\text{W} \mu\text{m}^{-2}$ ). The red circle shows laser irradiation position and area.

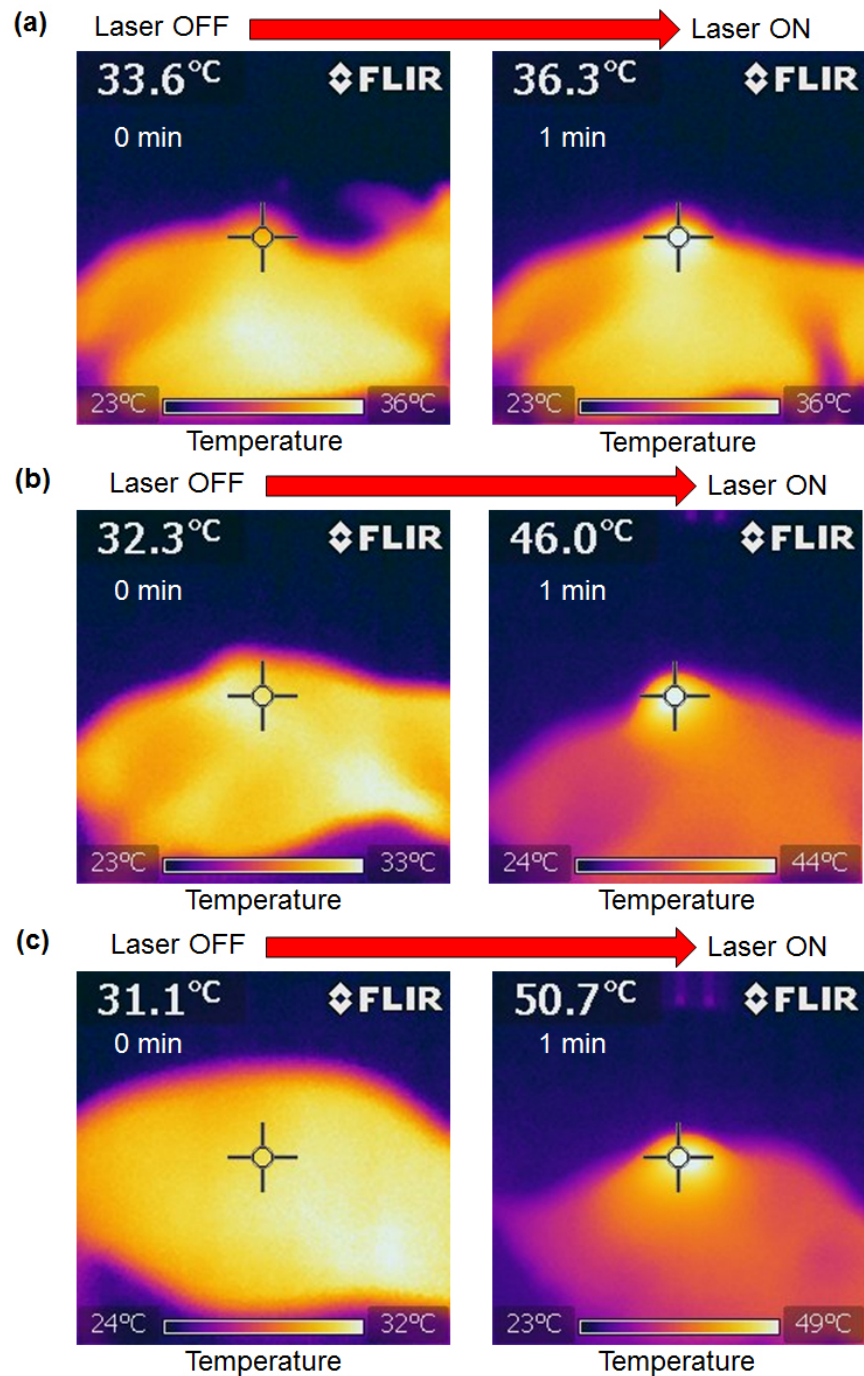

**Supplementary Figure 19** . Surface temperature of tumors treated with injections of (a) HEPES, (b) Avidin-DSPE-PEG<sub>2000</sub>-Amine-DC(8,9)PC-LM, and (c) Anti-EGFR-Biotin-Avidin-DSPE-PEG<sub>2000</sub>-Amine-DC(8,9)PC-LM after laser irradiation for 1 min.

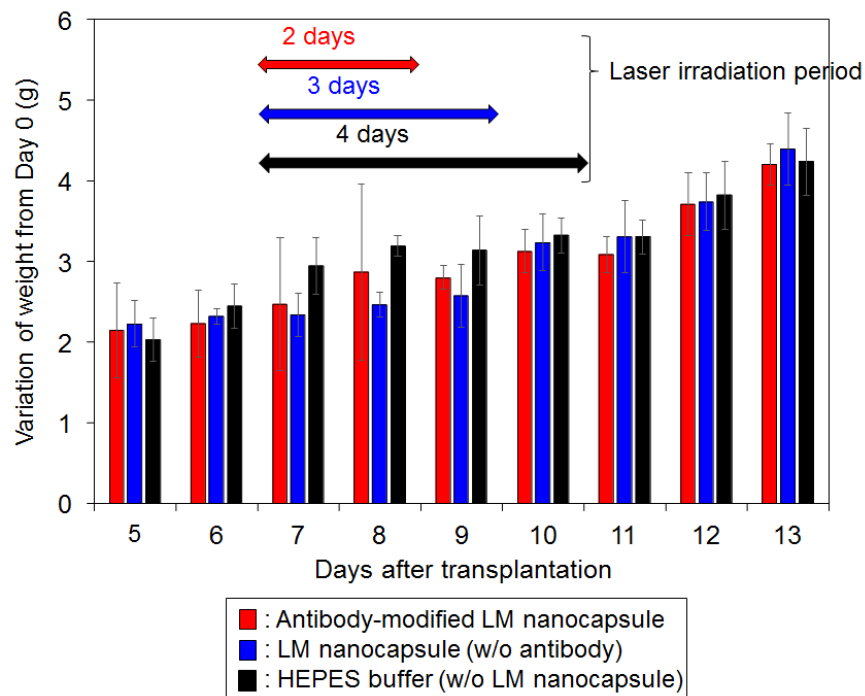

**Supplementary Figure 20.** Relative body weight of mice in the cancer phototherapy testing period. Error bars represent standard deviations of measurements from nine mice.

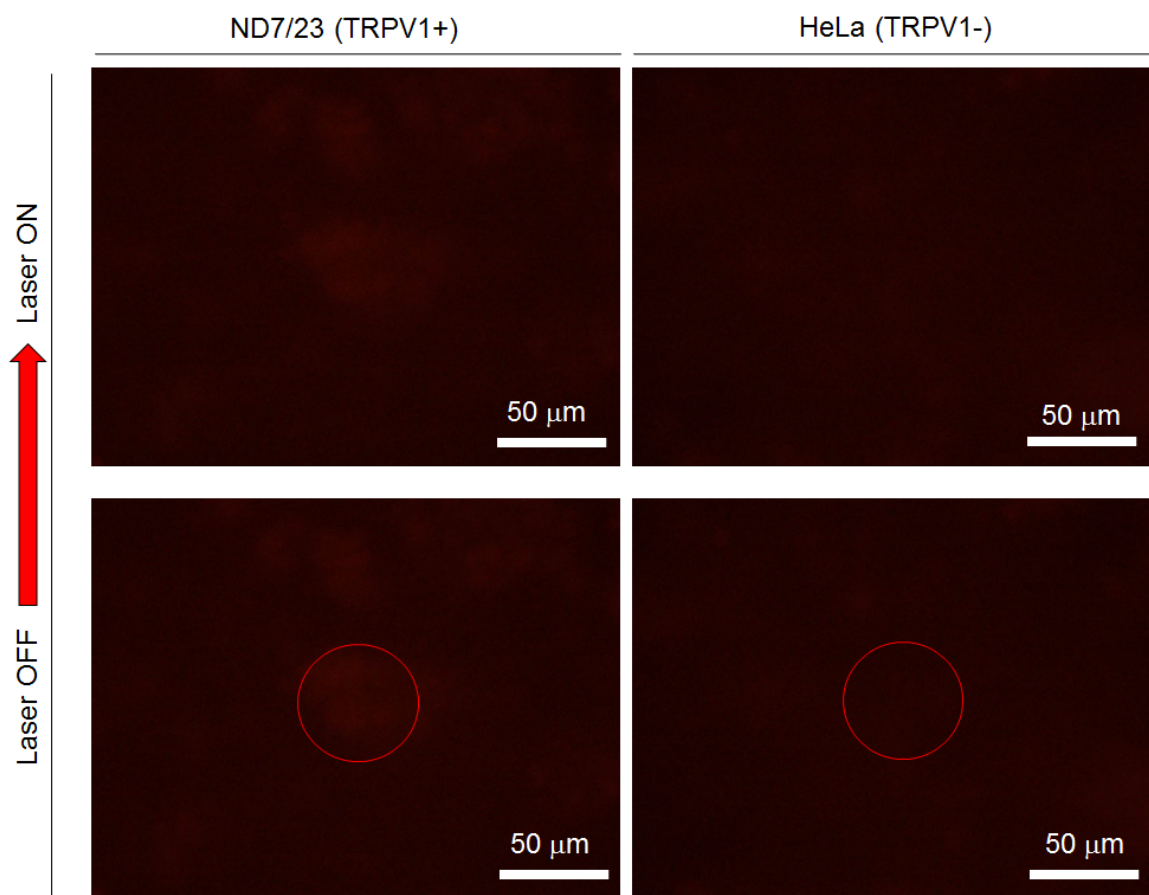

**Supplementary Figure 21.** Propidium iodide staining for dead cells. Magnification, 20 $\times$ ; (808 nm; laser 133 mW; 68  $\mu\text{W } \mu\text{m}^{-2}$ ). Irradiated areas are marked in red.

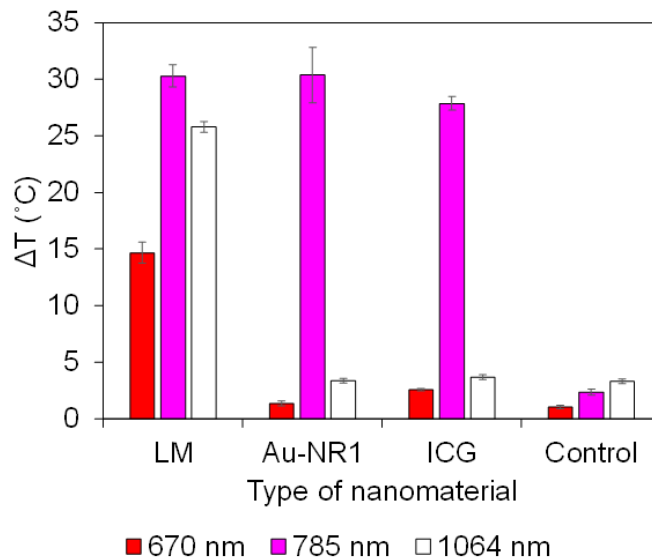

**Supplementary Figure 22.** Photothermal conversion of LM nanocapsules by various wavelengths laser irradiation. Data represent the mean of three determinations; error bars show the SD.

Photothermal conversion of LM nanocapsules was able to be conducted over a wide range of irradiation wavelengths (670, 785, and 1064 nm) (Supplementary Figure 22). Meanwhile, conventional NIR reagents (Au-NR1 and ICG) could be available by exciting with only monochromic light source at 785 nm (Supplementary Figure 22). Wide-ranging analyses generally require the use of a wide range of wavelengths of excitation laser. Thus, the photothermal property of LM nanocapsules would be induced and controlled at the desired wavelengths by exploiting suitable lasers for these wide-ranging analytical methods. More importantly, the utilization of second NIR optical window (NIR-II, 1000-1700 nm, also be divided into NIR-IIa and NIR-IIb separated by 1400 nm<sup>3,4</sup>) light leads to promising applications of LM nanocapsules treating deep-tissue-buried diseases or supplying energy to subcutaneous implantable bioelectronic devices.<sup>5</sup> However, only a few examples of NIR-II materials have been demonstrated, involving several photothermal compounds, such as Au nanoparticles<sup>6-8</sup> and organic dye molecules<sup>3,4</sup>.

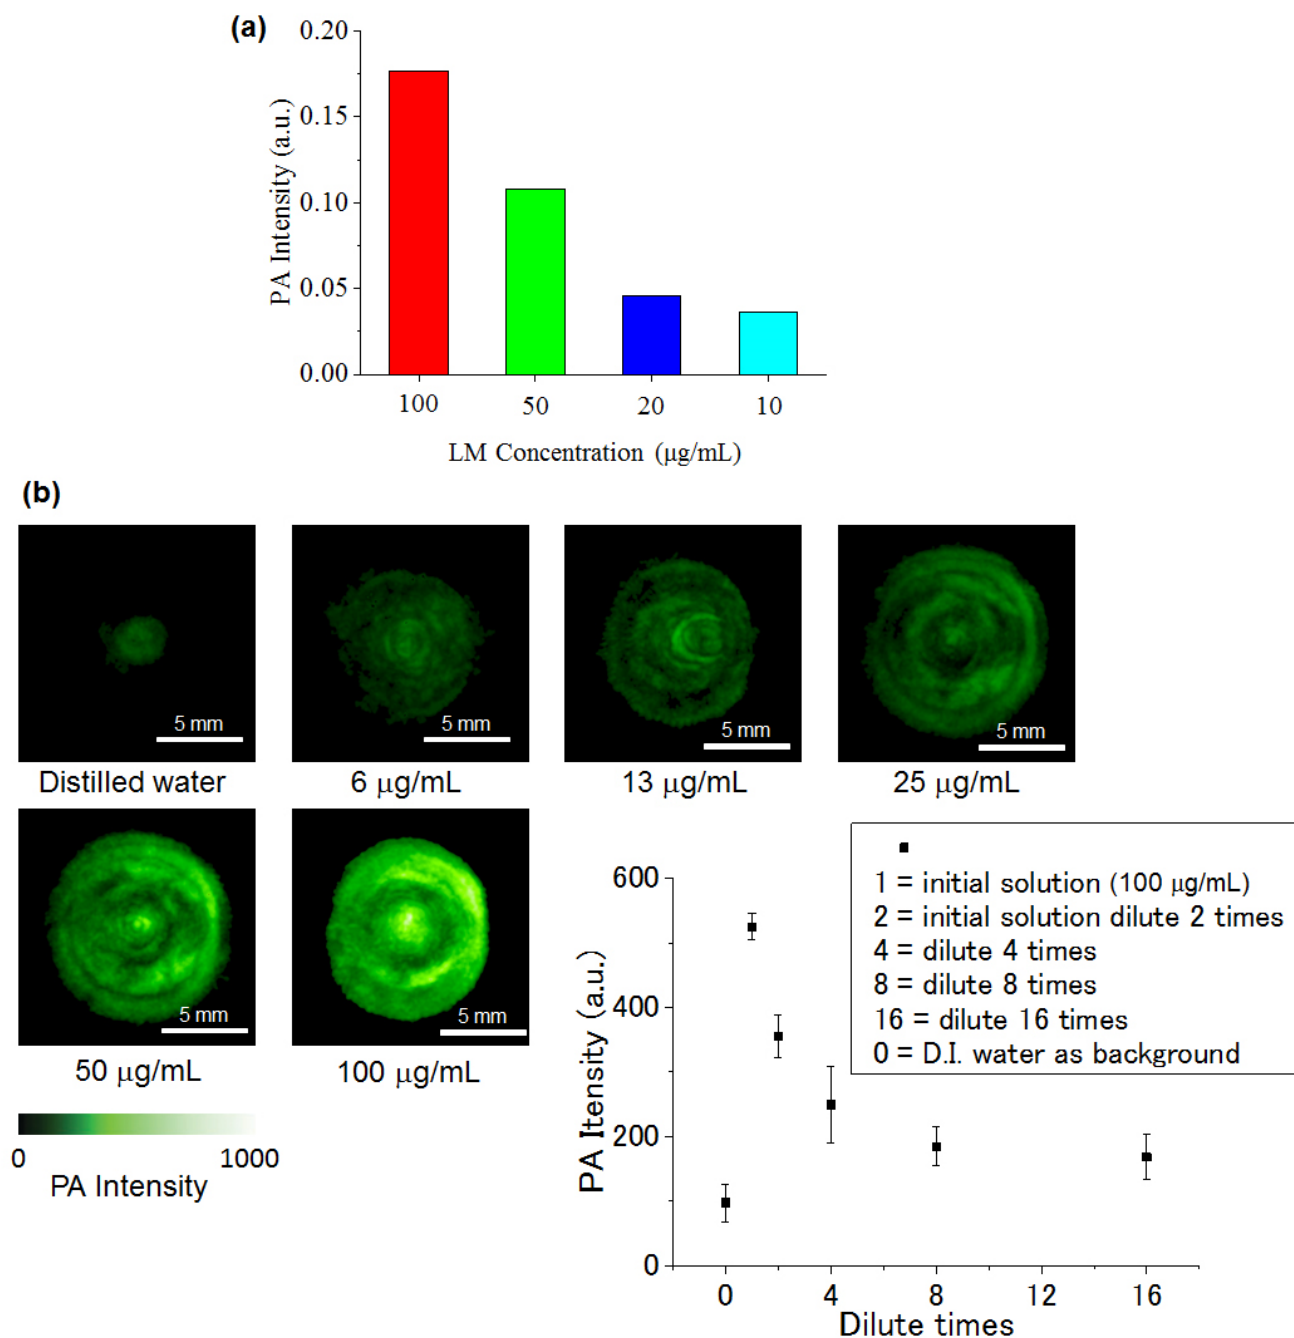

**Supplementary Figure 23.** (a) PA intensity of various LM nanocapsule concentrations at an excitation wavelength of 680 nm. (b) *Ex vivo* PA imaging of phantom samples. Error bars represent standard deviations of three separate measurements. Excitation wavelength of laser is 680 nm.



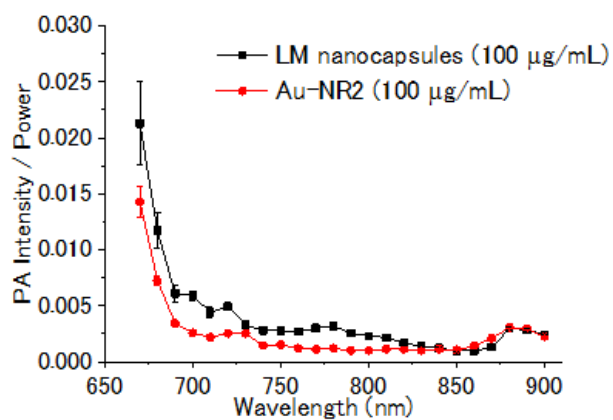

**Supplementary Figure 24.** PA intensity of LM nanocapsule and Au-NR2 at various excitation wavelength. Data represent the mean of three determinations; error bars show the SD.

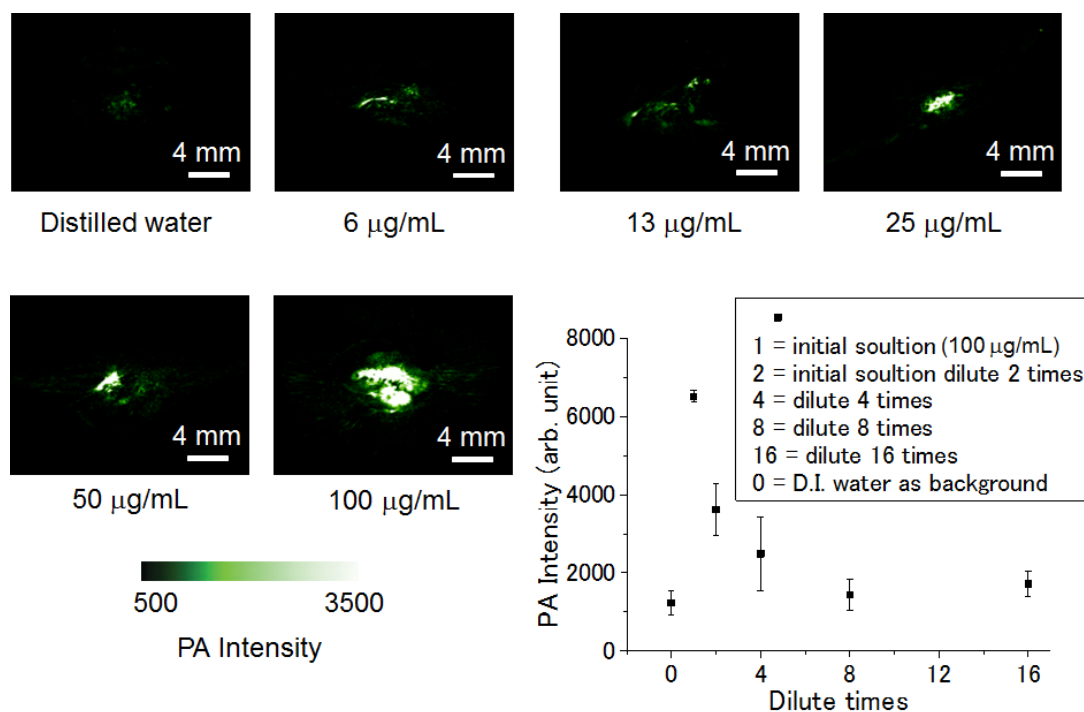

**Supplementary Figure 25.** Effect of various concentrations of LM nanocapsules on the PA signal *in vivo*. Error bars represent standard deviations of measurements from three mice. Excitation wavelength of laser is 680 nm.

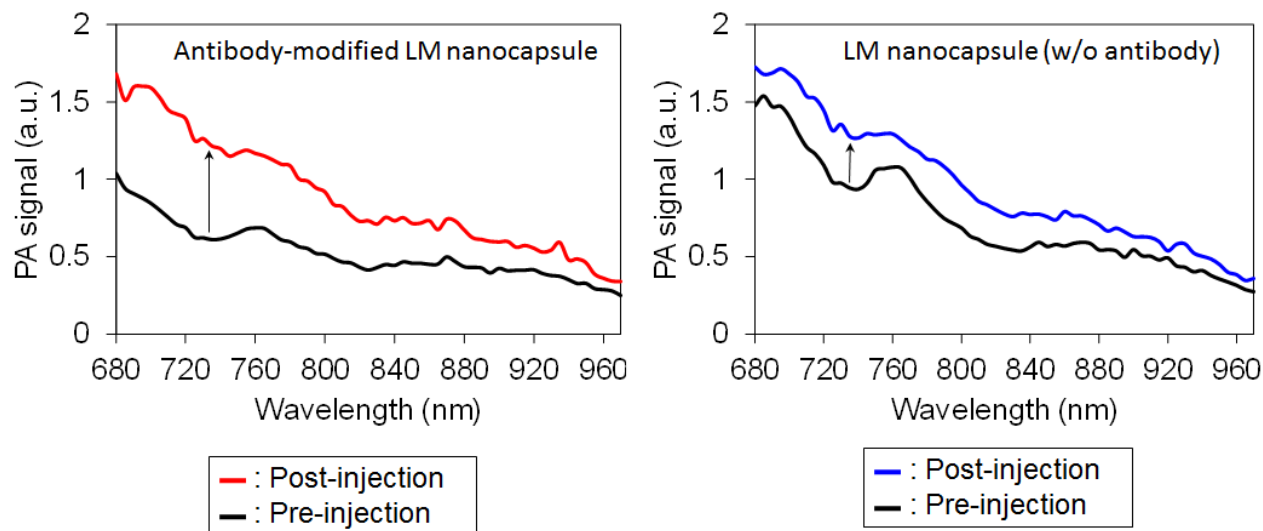

**Supplementary Figure 26.** PA signal in tumors treated with antibody-functionalised LM and plain LM nanocapsules before and after injections.

### Supplementary References

1. Albert, G. C., Roumeliotis, M. & Carson, J. J. L. The effect of temperature and freeze–thaw processes on gold nanorods. *Nanotechnology* **20**, 505502 (2009).
2. Zou, R., Zhang, Q., Zhao, Q., Peng, F., Wang, H., Yu, H. & Yang, J. Thermal stability of gold nanorods in an aqueous solution. *Colloids Surf A Physicochem Eng Asp.* **372**, 177–181 (2010).
3. Zhang, X.-D., Wang, H., Antaris, A. L., Li, L., Diao, S., Ma, R., Nguyen, A., Hong, G., Ma, Z., Wang, J., Zhu, S., Castellano, J. M., Wyss-Coray, T., Liang, Y., Luo, J. & Dai, H. Traumatic brain injury imaging in the second near-infrared window with a molecular fluorophore. *Adv. Mater.* **28**, 6872–6879 (2016).
4. Diao, S., Blackburn, J. L., Hong, G., Antaris, A. L., Chang, J., Wu, J. Z., Zhang, B., Cheng, K., Kuo, C. J. & Dai, H. Fluorescence imaging in vivo at wavelengths beyond 1500 nm. *Angew. Chem. Int. Ed.* **54**, 14758–14762 (2015).
5. Miyako, E., Hosokawa, C., Kojima, M., Yudasaka, M., Funahashi, R., Oishi, I., Hagihara, Y., Shichiri, M., Takashima, M., Nishio, K. & Yoshida, Y. A photo-thermal-electrical converter based on carbon nanotubes for bioelectronic applications. *Angew. Chem. Int. Ed.* **50**, 12266–12270 (2011).
6. Tsai, M.-F., Chang, S.-H. G., Cheng, F.-Y., Shanmugam, V., Cheng, Y.-S., Su, C.-H. & Yeh, C.-S. Au nanorod design as light-absorber in the first and second biological near-infrared windows for in vivo photothermal therapy. *ACS Nano* **7**, 5330–5342 (2013).
7. Vijayaraghavan, P., Liu, C.-H., Vankayala, R., Chiang, C.-S. & Hwang, K. C. Designing multi-branched gold nanoechinus for NIR light activated dual modal photodynamic and photothermal therapy in the second biological window. *Adv. Mater.* **26**, 6689–6695 (2014).
8. Ding, X., Liow, C. H., Zhang, M., Huang, R., Li, C., Shen, H., Liu, M., Zou, Y., Gao, N., Zhang, Z., Li, Y., Wang, Q., Li, S. & Jiang, J. Surface plasmon resonance enhanced light absorption and photothermal therapy in the second near-infrared window. *J. Am. Chem. Soc.* **136**, 15684–15693 (2014).
